# Supplementary material for: A light-induced shortcut in the planktonic microbial loop
Source: PubMed Central journal article supplement (PMC4941531; doi:10.1038/srep29286), 2016-07-11

## A light-induced shortcut in the planktonic microbial loop

Robert Ptacnik\*, Ana Gomes, Sarah-Jeanne Royer, Stella A. Berger, Albert Calbet, Jens C. Nejstgaard, Josep M. Gasol, Stamatina Isari, Stefanie D. Moorthi, Radka Ptacnikova, Maren Striebel, Andrey F. Sazhin, Tatiana M. Tsagaraki, Sultana Zervoudaki, Kristi Altoja, Panagiotis D. Dimitriou, Peeter Laas, Ayse Gazihan Akoglu, Rodrigo A. Martínez, Stefanie Schabhüttl, Ioulia Santi, Despoina Sousoni & Paraskevi Pitta

### Supplementary data

Table S1: Regression statistics for Figure 3.  $n=7$  for all tests.

|               |           | Estimate (significance level) |                        |
|---------------|-----------|-------------------------------|------------------------|
|               | Adj. rsq. | ln(light)                     | ln(light) <sup>2</sup> |
| HB            | 0.95      | -18688 ( $p<0.001$ )          | n.s.                   |
| Synechococcus | 0.85      | 19008 ( $p=0.005$ )           | -2862 ( $p=0.005$ )    |
| PE            | 0.89      | 212 ( $p<0.001$ )             | n.s.                   |
| HF            | 0.77      | -214 ( $p=0.006$ )            | n.s.                   |

Fig. S1. Cell diameter distribution (in  $\mu\text{m}$ ) of *Synechococcus* and PE as estimated from the relative side scatter signal (Calvo-Díaz & Morán 2006).

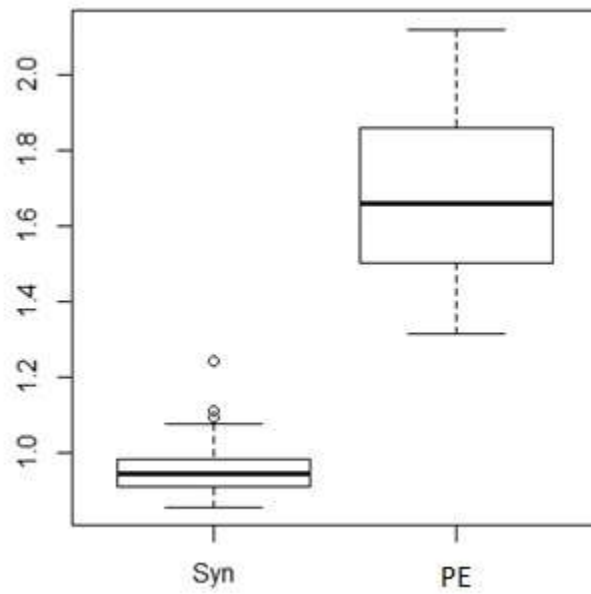

Fig. S2. HB activity related to HB abundances (left) and  $\ln(\text{light})$  intensity (right) in a multiple linear regression. Shown are the partial residuals together with mean (solid line) and confidence interval (broken line).

( $p < 0.001$  for HB and  $p = 0.96$  for  $\ln(\text{light})$ ;  $\text{adj.rsq} = 0.41$ ;  $\text{df} = 69$ .)

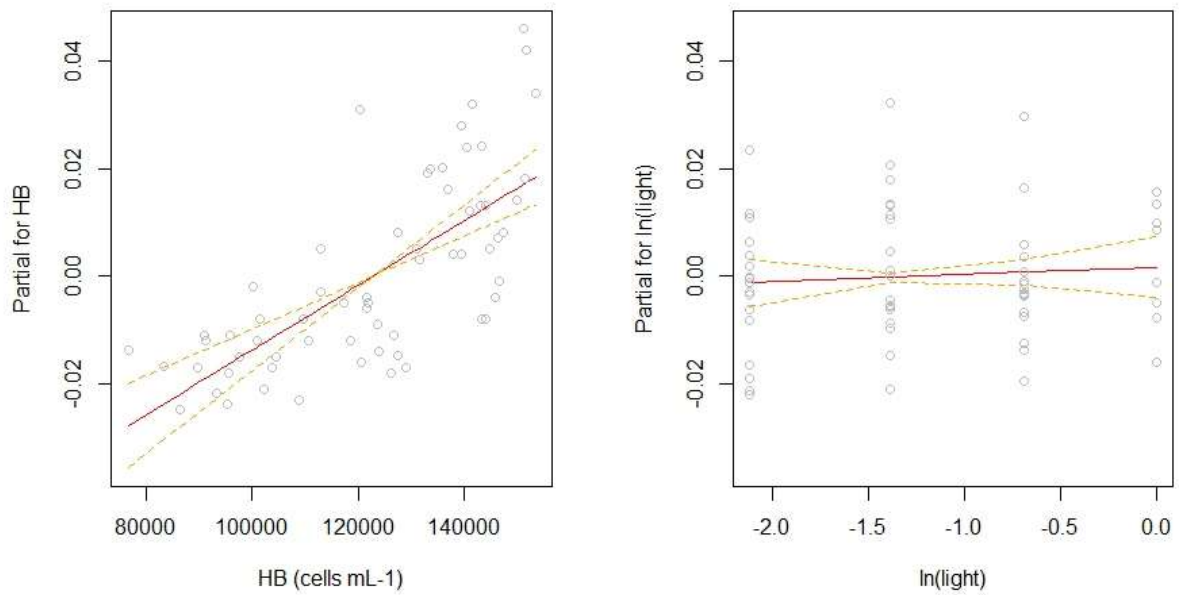

Supplement: srep29286-s1.pdf [file srep29286-s1.pdf]
